# Supplementary material for: Rhythm Generation through Period Concatenation in Rat Somatosensory Cortex
Source: PLOS journal article supplement (doi:10.1371/journal.pcbi.1000169), 2008-09-04
Supplement: S1 (10.1371/journal.pcbi.1000169.s001) [file journal.pcbi.1000169.s001]

301 Moved Permanently

# Moved Permanently

The document has moved here.

---

Apache Server at www.ploscompbiol.org Port 80
